# Supplementary material for: Improving thermo-tolerance of Saccharomyces cerevisiae by precise regulation of the expression of small HSP
Source: Royal Society of Chemistry journal article supplement (doi:10.1039/d3ra05216h), 2023-01-01
Supplement: d3ra05216h1.pdf [file d3ra05216h1.pdf]

## Supplementary material

### Improving thermo-tolerance of *Saccharomyces cerevisiae* by precise regulation the expression of small HSP

Mei-ling Zhang<sup>1</sup>, Hui Zhang<sup>1</sup>, Ya-xin He<sup>1</sup>, Zhao-hui Wu<sup>1</sup>, Ke Xu<sup>1,2\*</sup>

1. Department of Life Science, Tangshan Normal University, Tangshan , 063000, PR China

2. Key Lab for Industrial Biocatalysis, Ministry of Education, Department of Chemical Engineering, Tsinghua University, Beijing, 100084, PR China

**Table S1 Plasmids used in this study**

| Plasmid | Host Strains                    | Reference        |
|---------|---------------------------------|------------------|
| HCKan-P | <i>E.coli</i>                   | Guo et al., 2015 |
| HCKan-O | <i>E.coli</i>                   | Guo et al., 2015 |
| HCKan-T | <i>E.coli</i>                   | Guo et al., 2015 |
| POT-1   | <i>E.coli and S. cerevisiae</i> | Guo et al., 2015 |

**Table S2 Primers used in this study**

| Gene            | Primer-F                                  | Primer-R                                  |
|-----------------|-------------------------------------------|-------------------------------------------|
| <i>HSP12</i>    | AGCGTGGGTCTCAGATG<br>TCTGACGCAGGTAGAAA    | GTGCTGGGTCTCGGCTA<br>CTTCTTGGTTGGGTCTTCTT |
| <i>HSP26</i>    | AGCGTGGGTCTCAGATG<br>TCATTTAACAGTCCATTTTT | GTGCTGGGTCTCGGCTA<br>GTTACCCACGATTCTTGAG  |
| <i>HSP30</i>    | AGCGTGGGTCTCAGATG<br>AACGATACGCTATCAAGCTT | GTGCTGGGTCTCGGCTA<br>AGCAGTATCTTCGACAGCTT |
| <i>HSP42</i>    | AGCGTGGGTCTCAGATG<br>AGTTTTTATCAACCATCCCT | GTGCTGGGTCTCGGCTA<br>ATTTTCTACCGTAGGGTTGG |
| <i>sHSP-HB8</i> | AGCGTGGGTCTCAGATG<br>CTGGAGCGCCACGACCGCCT | GTGCTGGGTCTCGGCTA<br>CGCCTCCTTTAGGGGAAGGG |
| <i>ibpa-MB4</i> | AGCGTGGGTCTCAGATG<br>AGCTTAATGAGAAGAGGAAG | GTGCTGGGTCTCGGCTA<br>CTCTATATCAATTCTTCTTT |

**Table S3 The information about TDH3 and YNL247 genes and promoters**

| Gene        | Gene sequence                                                                                                                                                                                                                                                                                                                                                                                                                                                                                                                                                                                                                                                                                                                                                                                                                                                                                                                                                                                                                                                                                                                                                                                                                                                                                               | Information description                                 |
|-------------|-------------------------------------------------------------------------------------------------------------------------------------------------------------------------------------------------------------------------------------------------------------------------------------------------------------------------------------------------------------------------------------------------------------------------------------------------------------------------------------------------------------------------------------------------------------------------------------------------------------------------------------------------------------------------------------------------------------------------------------------------------------------------------------------------------------------------------------------------------------------------------------------------------------------------------------------------------------------------------------------------------------------------------------------------------------------------------------------------------------------------------------------------------------------------------------------------------------------------------------------------------------------------------------------------------------|---------------------------------------------------------|
| <i>TDH3</i> | 1 ATGGTTAGAG TTGCTATTAA CGGTTTCGGT AGAATCGGTA<br>GATTGGTCAT GAGAATTGCT<br>61 TTGTCTAGAC CAAACGTCGA AGTTGTTGCT<br>TTGAACGACC CATTTCATCAC CAACGACTAC<br>121 GCTGCTTACA TGTTCAAGTA CGACTCCACT<br>CACGGTAGAT ACGCTGGTGA AGTTTCCCAC<br>181 GATGACAAGC ACATCATTGT CGATGGTAAG<br>AAGATTGCTA CTTACCAAGA AAGAGACCCA<br>241 GCTAACTTGC CATGGGGTTC TTCCAACGTT<br>GACATCGCCA TTGACTCCAC TGGTGTTTTC<br>301 AAGGAATTAG AACTGCTCA AAAGCACATT<br>GACGCTGGTG CCAAGAAGGT TGTTATCACT<br>361 GCTCCATCTT CCACCGCCCC AATGTTGCTC<br>ATGGGTGTTA ACGAAGAAAA ATACACTTCT<br>421 GACTTGAAGA TTGTTTCCAA CGCTTCTTGT<br>ACCACCAACT GTTTGGCTCC ATTGGCCAAG<br>481 GTTATCAACG ATGCTTTCGG TATTGAAGAA<br>GGTTTGATGA CCACTGTCCA CTCTTTGACT<br>541 GCTACTCAA AGACTGTTGA CGGTCCATCC<br>CACAAGGACT GGAGAGGTGG TAGAACCGCT<br>601 TCCGGTAACA TCATCCCATC CTCCACCGGT<br>GCTGCTAAGG CTGTCGGTAA GGTCTTGCCA<br>661 GAATTGCAAG GTAAGTTGAC CGGTATGGCT<br>TTCAGAGTCC CAACCGTCGA TGTCTCCGT<br>721 GTTGACTTGA CTGTCAAGTT GAACAAGGAA<br>ACCACCTACG ATGAAATCAA GAAGGTTGTT<br>781 AAGGCTGCCG CTGAAGGTAA GTTGAAGGGT<br>GTTTTGGGTT ACACCGAAGA CGCTGTTGTC<br>841 TCCTCTGACT TCTGGGTGA CTCTCACTCT<br>TCCATCTTCG ATGCTTCCGC TGGTATCCAA<br>901 TTGTCTCCAA AGTTCGTCAA GTTGGTCTCC<br>TGGTACGACA ACGAATACGG TTA CTCTACC<br>961 AGAGTTGTCG ACTTGTTGA ACACGTTGCC<br>AAGGCTTAA | Glyceraldehyde-3-<br>phosphate dehydrogenase<br>(GAPDH) |
|             | 1 ATGAATATCT TCATAAAAGC CCTGAGAAGA<br>TATACTATAA TGTCTACGCC GAAGATTGTG<br>61 CAGCCCAAAT GGAAGGTTCC AACGCCACAA<br>GCTAAAGAAA CTGTGTTGAA GTTGTACAAC                                                                                                                                                                                                                                                                                                                                                                                                                                                                                                                                                                                                                                                                                                                                                                                                                                                                                                                                                                                                                                                                                                                                                           | Cysteinyl-tRNA<br>synthetase                            |

121 AGTTTAAACAA GATCTAAGGT TGAATTCATT  
CCGCAATCTG GCAATAGAGG TGTCACTTGG  
181 TACTCTTGCG GTCCTACTGT TTACGATGCC  
TCCCATATGG GTCATGCCAG AACTATGTC  
241 TCTATTGATA TCAATAGAAG AATTATTCAA  
GATTATTTTG GTTACGACGT GCAATTTGTG  
301 CAAAATGTTA CTGATATCGA CGATAAAATT  
ATTTTGAGAG CTAGACAAAA CTATTTATTT  
361 GACAATTTTG TCAAAGAAAA TGATACCAAA  
TTCAACGCCA CTGTTGTTGA CAAGGTCAA  
421 ACCGCACTTT TCCAATATAT CAACAAAAAT  
TTACTATTC AAGGCAGCGA GATCAAACT  
481 ATCGAAGAAT TTGAAACTTG GTTATCGAAT  
GCTGATACTG AACTTTAAA ATTGGAGAAT  
541 CCTAAATTCC CTATGCATGT CACCGCAGTT  
CAAAATGCTA TTGAATCAAT CACTAAGGGC  
601 GATTCCATGG ACGCAGAAGT TGCCTTTGAA  
AAAGTCAAGG ACGTTACGGT TCCTCTATTG  
661 GATAAAGAAT TGGGCTCTAC CATTAGCAAT  
CCAGAGATTT TCCGCCAACT TCCAGCTTAC  
721 TGGGAACAGA AATTCAATGA TGACATGTTA  
TCATTAAACG TGCTACCTCC CACCGTTACA  
781 ACTCGTGTTT CTGAGTACGT TCCAGAAATT  
ATTGACTTTG TTCAAAAAAT TATTGATAAT  
841 GGTTACGCAT ATGCCACTTC CGACGGTTCC  
GTGTACTTTG ATACTTTAAA ATTTGACAAA  
901 TCCCCAAATC ATGACTATGC TAAATGCCAG  
CCATGGAATA AGGGCCAGTT AGACTTAATT  
961 AATGATGGTG AAGGGTCCTT AAGCAACTTT  
GCTGATAACG GAAAAAGTC GAATAATGAT  
1021 TTTGCTTTAT GGAAGGCTTC CAAGGCAGGT  
GAACCTGAGT GGAATCACC ATGGGGTAAG  
1081 GGTAGACCAG GATGGCATAT TGAATGTTCT  
GTGATGGCCA GTGATATCCT AGGCTCTAAC  
1141 ATCGATATTC ATTCAGGTGG CATCGATTTG  
GCCTTTCCTC ACCATGATAA CGAATTGGCT  
1201 CAATCCGAGG CTCGCTTCGA CAATCAACAG  
TGGATCAACT ATTTCTTACA TACGGGCCAT  
1261 TTACATATTG AGGGTCAAAA AATGTCTAAA  
TCCTTAAAGA ATTCATTAC CATTCAAGAA  
1321 GCTTTGAAAA AATTCTCACC GCGCCAATTA  
AGATTGGCTT TTGCCTCAGT ACAATGGAAC  
1381 AATCAATTGG ATTTCAAGGA ATCTTTGATC  
CATGAAGTAA AGTCATTTGA AACTCCATG

1441 AACAAATTTTT TTAAGACTAT TAGAGCATTG  
 AAGAACGATG CAGCTTCTGC AGGTCATATC  
 1501 TCTAAAAAGT TTAGTCCCTT AGAGAAAGAA  
 TTATTGGCTG ATTTTGTGA AAGTGAATCG  
 1561 AAAGTCCATT CGGCGTTCTG TGATAATTTA  
 TCCACACCTG TTGCTTTGAA GACACTGAGC  
 1621 GAATTAGTGA CCAAGTCAAA CACATACATT  
 ACCACTGCAG GTGCTGCTTT AAAAATTGAG  
 1681 CCCTTGATTG CTATCTGTAG CTACATCACC  
 AAAATCTTAA GAATAATTGG ATTTCCATCC  
 1741 CGTCCTGACA ATTTGGGTTG GGCAGCCCAA  
 GCTGGCTCCA ACGATGGATC CCTAGGCTCA  
 1801 TTGGAAGACA CTGTTATGCC ATATGTAAAG  
 TGTTTATCCA CATTTAGAGA TGATGTACGT  
 1861 TCCTTAGCTA TCAAGAAAGC CGAACCCAAG  
 GAATTCTTGC AATTAACGGA TAAAATTAGA  
 1921 AACGAAGATT TGCTAAACTT GAATGTTGCC  
 TTGGATGATA GGAATGGACA ATCTGCCTTG  
 1981 ATCAAATTTT TGAATAACGA TGAAAAATTG  
 GAAATTGTCA AGCTAAACGA GGAGAAACAT  
 2041 GCCAACGAAC TAGCAAAGAA ACAAAGAAA  
 TTGGAACAGC AGAAATTAAG AGAGCAGAAG  
 2101 GAAAACGAGA GGAAGCAGAA AGCTCAAATT  
 AAACCACAAG ATATGTTCAA GGATGTCACA  
 2161 TTGTACAGTG CTTGGGACGA GCAAGGCCTT  
 CCAACAAAGG ACAAAGACGG TAATGATATC  
 2221 ACCAAGAGTA TGACCAAGAA GTTGAAGAAG  
 CAATGGGAAC AACAAAAGAA GCTACATGAA  
 2281 GAGTACTTTG GTGAAGACAA ATAG  
 1 ATAAAAACA CGCTTTTTC A GTTCGAGTTT  
 ATCATTATCA ATACTGCCAT TTCAAAGAAT  
 61 ACGTAAATAA TTAATAGTAG TGATTTTCCT  
 AACTTTATTT AGTCAAAAAA TTAGCCTTTT  
 121 AATTCTGCTG TAACCCGTAC ATGCCCAAAA  
 TAGGGGCGG GTTACACAGA ATATATAACA  
 181 TCGTAGGTGT CTGGGTGAAC AGTTTATTCC  
 TGGCATCCAC TAAATATAAT GGAGCCCGCT  
 241 TTTTAAAGCTG GCATCCAGAA AAAAAAAGAA  
 TCCCAGCACC AAAATATTGT TTTCTTCACC  
 301 AACCATCAGT TCATAGGTCC ATTCTCTTAG  
 CGCAACTACA GAGAACAGGG GCACAAACAG  
 361 GCAAAAAACG GGCACAACCT CAATGGAGTG  
 ATGCAACCTG CCTGGAGTAA ATGATGACAC  
 421 AAGGCAATTG ACCCACGCAT GTATCTATCT

constitutive promoter

*TDH3p*

CATTTTCTTA CACCTTCTAT TACCTTCTGC  
 481 TCTCTCTGAT TTGGAAAAAG CTGAAAAAAA  
 AGGTTGAAAC CAGTTCCTG AAATTATTCC  
 541 CCTACTTGAC TAATAAGTAT ATAAAGACGG  
 TAGGTATTGA TTGTAATTCT GTAAATCTAT  
 601 TTCTTAAACT TCTTAAATTC TACTTTTATA  
 GTTAGTCTTT TTTTGTAGTTT TAAAACACCA  
 661 AGAACTTAGT TTCGAATAAA CACACATAAA  
 CAAACAAA

1 TACTAGATAA AGTGCAAAAG GTTGATAACG  
 ACTGCAATAG TGGTAGCAAC TAAAAAGCC  
 61 CTCCTAATAT CATTAGTGTT CATGCAAGAA  
 TACTTACTAT TAAAAATGAG ATGGAAAATT  
 121 TCAGCTCATC GCAATAAAAA ATTTTCAGCG  
 CGGGTGACCG CAAACATTTT TCATCGCGAA  
 181 GAGTCAAAAG ACATTATCAA TTGAAAAGAA  
 CAGTATTGCT AATTGGCGTC GGTGATTAGG  
 241 TGCCCGTCA AGTTCTTATT CTATGC

constitutive promoter

*YNL247wp*

**Table S4 Primers used for qPCR analysis**

| Gene            | Primer-F               | Primer-R             |
|-----------------|------------------------|----------------------|
| <i>HSP12</i>    | CGCAGGTAGAAAAGGATTCCGG | TTGGGTCTTCTTCACCGTGG |
| <i>HSP26</i>    | AAGAGGCTACGCACCAAGAC   | ACCATCCTTCTGAGGCTCA  |
| <i>HSP30</i>    | CTGGTTCTTGTCTGGCCAT    | TGTTTCAGGAGCCGCATCTT |
| <i>HSP42</i>    | AGGACCAACCAACAGGCAAA   | AGCACGGGGAATTTAACGGT |
| <i>sHSP-HB8</i> | CGCCTGGAAACCCTGAGAAA   | CTTTAGGGGAAGGGCCGTG  |
| <i>ibpa-MB4</i> | AAGAGGAAGAGACTGGTGGGA  | TCTTTGGCTTGCTCGGATGG |

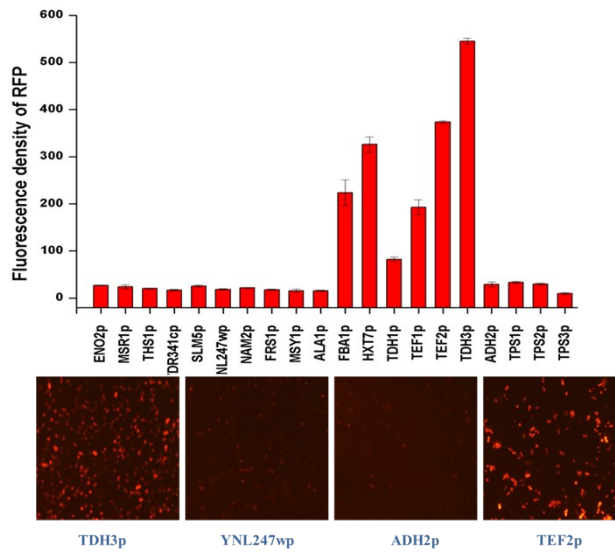

**Figure S1 Characterization of promoter strength**

Experimental method of Figure S1

All promoters followed by DNA amplification using their respective primers by PCR. PCR products were purified by TIAN quick Midi Purification Kit (TIANGEN) and genetic circuits were constructed with standard vector parts by employing the Golden Gate Assembly. The promoters were ligated into the POT vectors as promoter-GFP-SLM5t, followed by transformation into *Saccharomyces cerevisiae* strain BY4741. The engineered strains were grown at 30°C, 12h in SD medium lacking uracil with 20 g/L glucose, then we detect the intensity of red fluorescence using a fluorescence microplate reader and observe it under a fluorescence microscope, the excitation wavelength 532nm (green light), emission wavelength 588nm.

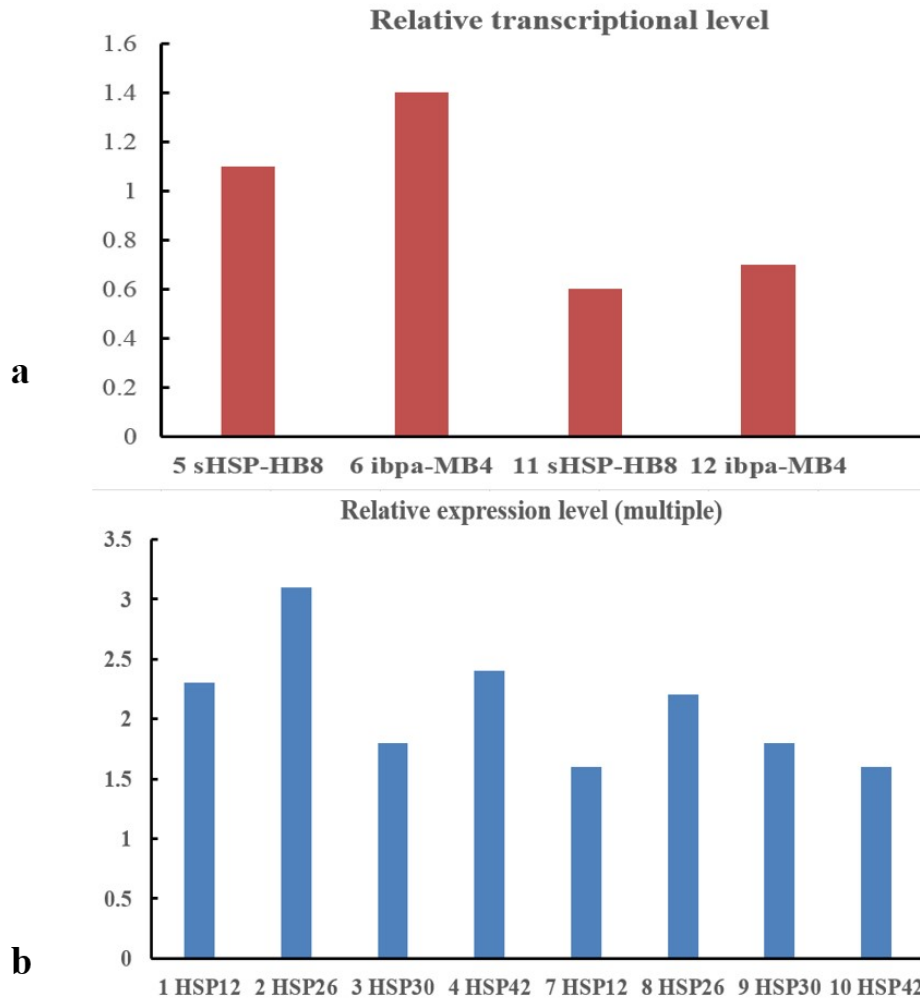

**Figure S2** Transcriptional levels of genetic circuits by RT-qPCR. (a) *ibpa-MB4* and *sHSP-HB8*; (b) *HSP12*, *HSP26*, *HSP30*, and *HSP42* (b. The expression of each gene relative to the expression of the same gene in the wt strain. The calculation method is to divide the expression level of HSP genes in the engineered strain by the expression level of HSP genes in the wild-type strain ).

#### Experimental method of Figure S2

The total RNA was extracted from *Saccharomyces cerevisiae* cells by Trizol and served as the template to obtain complementary DNA using the TransScript First-Strand cDNA Synthesis Kit (Trans, China). The converted cDNA and the specific primers was added to Top/Tip Green qRCR SuperMix to subject RT-PCR analysis employing the Roche LightCycler 96 Real-Time PCR System (Cal, US). ACT1 was selected as the internal reference gene.

#### Supplementary references

1. Guo Y, Dong J, Zhou T, et al. YeastFab: the design and construction of standard

biological parts for metabolic engineering in *Saccharomyces cerevisiae*. *Nucleic Acids Res*, 2015, 43(13):e88.
